# Supplementary material for: Integrating single-cell and bulk RNA-seq to reveal cholesterol homeostasis-related genes via machine learning to predict prognosis and therapeutic response in hepatocellular carcinoma
Source: Research Square preprint supplement (doi:10.21203/rs.3.rs-6318645/v1), 2025-04-21
Supplement: Supplementary file 1 [file 366f9facab2385868a651a03.docx]

**Supplementary Figure legends**

**
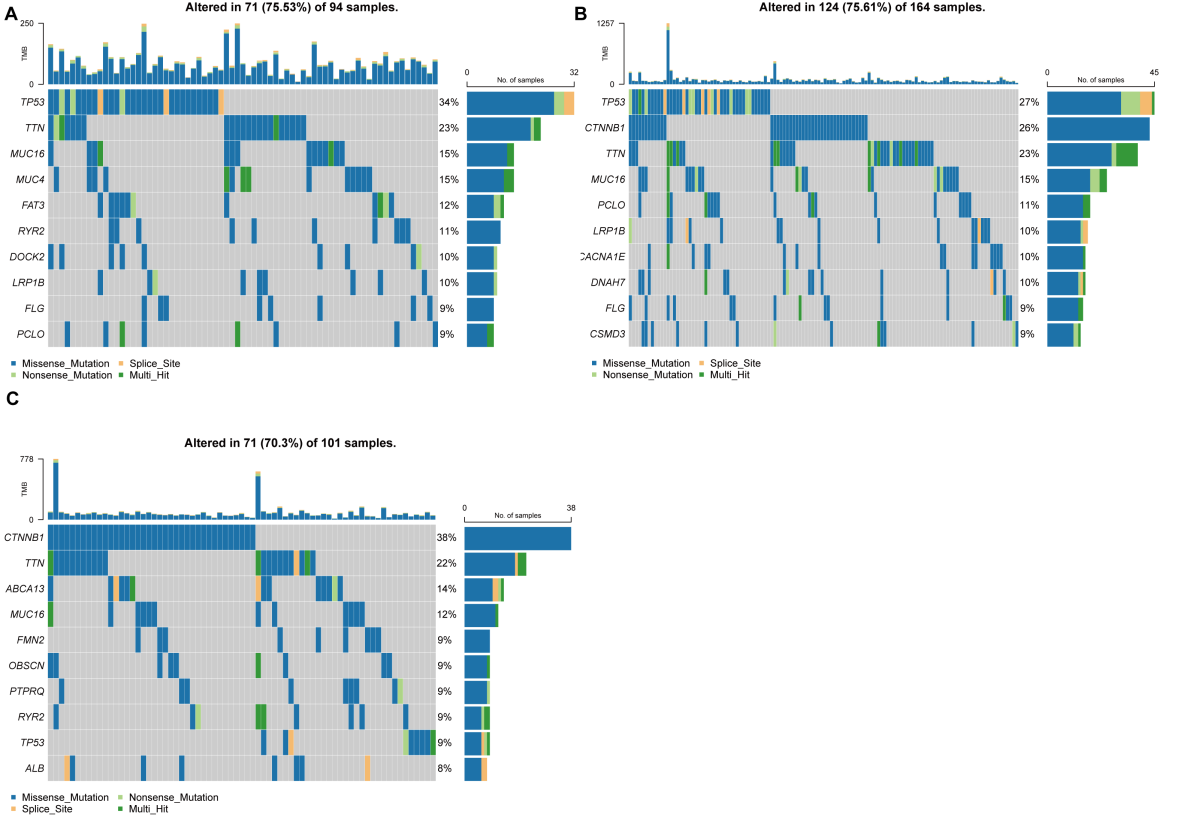
**

**Sup-Fig. 1.** Validation of the risk score. **(A-C),** The gene mutation status in three clusters.


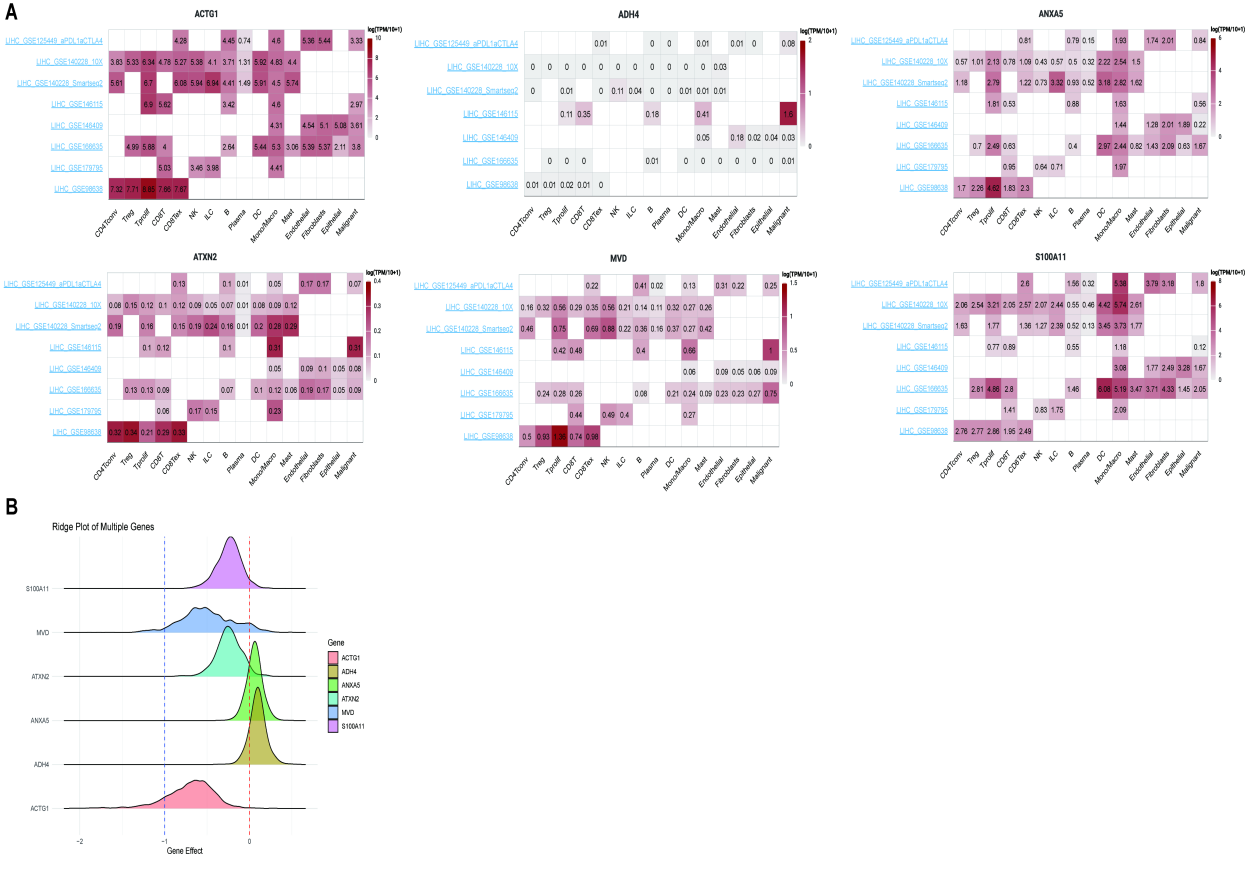


**Sup-Fig. 2.** Analysis of important genes.

**A.** The single cell expression of important genes in indicated scRNA data.

**B.** The gene effect value of important genes (The lower the value of gene effect, the more significant the effect of inhibiting cell proliferation after knocking out genes in tumor cells.).
